# Supplementary material for: Individual and Combined Effect of Zearalenone Derivates and Beauvericin Mycotoxins on SH-SY5Y Cells
Source: PubMed Central journal article supplement (PMC7232440; doi:10.3390/toxins12040212), 2020-03-27
Supplement: toxins-12-00212-s001.pdf [file toxins-12-00212-s001.pdf]

# Supplementary Materials: Individual and Combined Effect of Zearalenone Derivates and Beauvericin Mycotoxins on SH-SY5Y Cells

Fojan Agahi, Guillermina Font, Cristina Juan and Ana Juan-García

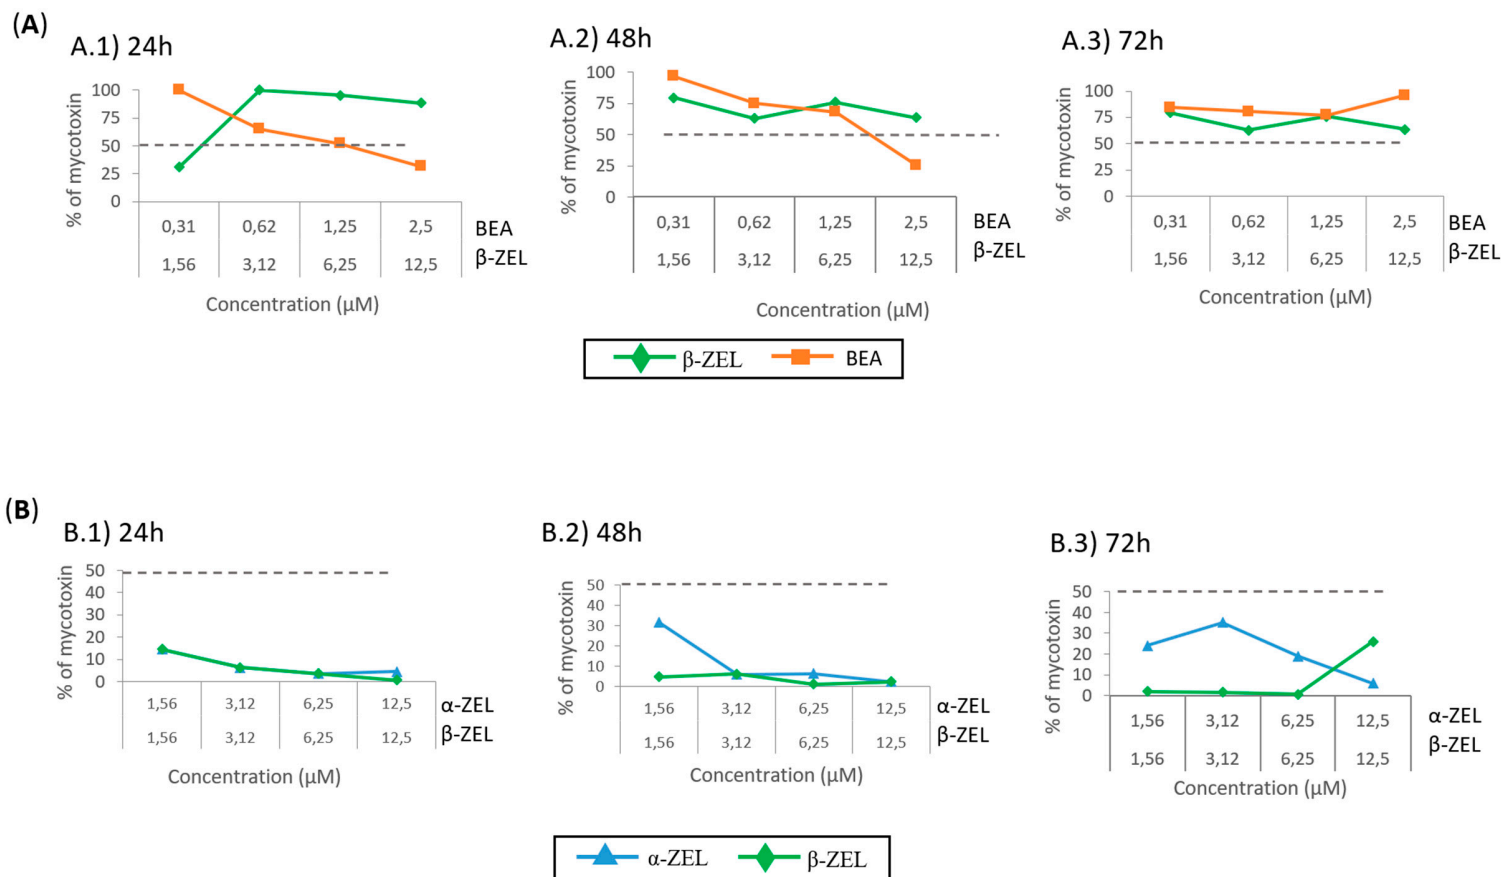

**Figure S1.** Percentage of  $\alpha$ -ZEL,  $\beta$ -ZEL, and BEA remaining in the medium of SH-SY5Y cells after treatment during 24, 48, and 72 h at different concentrations and combinations by LC-ESI-qTOF-MS. (A)  $\beta$ -ZEL+BEA and (B)  $\alpha$ -ZEL +  $\beta$ -ZEL.
